# Supplementary material for: Centromeric instability and chromoanasynthesis observed in nine supernumerary marker chromosomes resolved with long-read genome sequencing
Source: HighWire-hosted journal article supplement (doi:10.1101/gr.281175.125), 2026-04
Supplement: Supplemental_Tables.xlsx [file Supplemental_Tables.xlsx]

## Sheet: Supplemental Table S1
Supplemental Table 1: Long read sequencing read length and median coverage per sample.
Sample ID	Read Length (bp)	Median Coverage
RD_P276	14574	31X
RD_P278	12796	28X
RD_P273	15177	67X
RD_P272	18632	55X
RD_P274	15621	30X
RD_P275	14999	27X
RD_P328	16962	35X
RD_P166	10999	27X
RD_P550	19416	27X
RD_P586	18073	22X

## Sheet: Supplemental Table S2
Supplemental Table 2: Number of OMIM, triplosensitive, intellectual disability-related, and imprinted genes involved in sSMC segments. Coordinates according to genome build T2T-CHM13v2.0.
Case ID	Category	Size (MBp)	Segment	Chr	Coordinate start	Coordinate end	Cytoband start	Cytoband end	OMIM genes	Triplosensitive genes	ID genes
RD_P276	r(5)	5.3	A	Chr 5	32320809	37676103	5p13.3	5p13.2	33	3; DNAJC21, NIPBL, CPLANE1	4; NIPBL, LMBRD2, NADK2, NPR3
		6.2	B	Chr 5	43290183	49497791	5p12	5q11.1	8	1; FGF10	2; FGF10, HCN1
RD_P278	r(7)	0.008	A	Chr 7	59978281	59987274	7p11.2	7p11.2	0	0	0
		12.1	B	Chr 7	59987351	72094570	7p11.2	7q11.22	48	3; AUTS2, GUSB, SBDS	5; KCTD7, AUTS2, GUSB, SBDS, ASL
RD_P273	r(8)	4.5	A	Chr 8	46120188	50587595	8q11.1	8q11.21	9	0	1; SNTG1
		26.4	B	Chr 8	51426339	77860383	8q11.21	8q21.13	79	6; CPA6, RB1CC1, CHD7, EYA1, CA8, CSPP1	14; CPA6, CHD7, ASPH, SOX17, TMEM70, ZFHX4, TTPA, EYA1, CA8, ARFGEF1, CYP7B1, PEX2, GDAP1, CSPP1
RD_P272	r(9)	1.4	A	Chr 9	28144043	29574388	9p21.1	9p21.1	1	0	0
		NA	B	Chr 9	30592557	NA	9p21.1	NA
		0.5	C	Chr 9	31050290	31568556	9p21.1	9p21.1	2	0	0
		7.2	D	Chr 9	32076512	39306747	9p21.1	9p12	73	6; GRHPR, EXOSC3, DNAI1, FANCG, B4GALT1, PIGO
		NA	E	Chr 9	44432381	NA	9p11.2	NA			15; GNE, EXOSC3, FANCG, B4GALT1, GBA2, GALT, NPR2, NUDT2, PIGO, VCP, RMRP, APTX, RUSC2, IL11RA, SIGMAR1
		0.13	F	Chr 9	91060755	91194419	9q21.31	9q21.31	0	0	0
RD_P166	r(13)		A	Chr 13	NA	11452840	NA	13p11.2	8	0	0
			B	Chr 13	NA	29045867	NA	13q12.3	121	8; POLR1D, PDX1, SACS, SGCG, POMP, ATP8A2, GJB2, GJB6	8; ZMYM2, POLR1D, GJA3, SACS, ATP8A2, CDK8, CENPJ, GJB2
		28.4	C	Chr 13	56358138	84773620	13q21.1	13q31.1	58	2; EDNRB, PCDH9	4; PIBF1, EDNRB, CLN5, FBXL3
RD_P550	r(14)	7.2	A	Chr 14	9208604	16434843	14p11.2	14q11.2	41	5; RPGRIP1, HNRNPC, SUPT16H, PNP, CHD8	6; OSGEP, RPGRIP1, TTC5, SUPT16H, PNP, CHD8
RD_P275	r(20)	1.7	A	Chr 20	3306020	4979434	20p13	20p13	27	0	1; PANK2
		17.5	B	Chr 20	24892355	42368945	20p11.21	20q12	108	4; ASXL1, ABHD12, GDF5, AHCY	13; GSS, ERGIC3, TTI1, ASXL1, ABHD12, SLC32A1, EPB41L1, ITCH, GDF5, DNMT3B, PIGU, SAMHD1, AHCY
		6.4	C	Chr 20	59369410	65776662	20q13.31	20q13.33	50	3; EEF1A2, KCNQ2, GNAS	7; EEF1A2, RTEL1, KCNQ2, COL9A3, CHRNA4, TAF4, GNAS
RD_P328	der(7)t(X;7;5)	2.9	A	Chr 5	177119928	182045438	5q35.2	5q35.3	17	6; ADAMTS2, NHP2, PROP1, NSD1, GRM6, B4GALT7	5; NHP2, PROP1, NSD1, GRM6, B4GALT7
		31.4	B	Chr 7	43886314	75313264	7p13	7q11.23	159	8; GUSB, CAMK2B, GRB10, AUTS2, ELN, PSPH, EGFR, SBDS	13; FKBP6, PKD1L1, GUSB, CAMK2B, GCK, DDC, AUTS2, ASL, ELN, PSPH, KCTD7, SBDS, ZNF713
		15	C	Chr X	1	14614119	Xp22.33	Xp22.2	50	10; CSF2RA, MSL3, MID1, ANOS1, OFD1, FANCB, CLCN4, STS, ARSD, TRAPPC2	23; CSF2RA, CRLF2, MSL3, SHROOM2, ARHGAP6, MID1, HCCS, ATXN3L, WWC3, OFD1, FANCB, PIGA, DHRSX, SHOX, NLGN4X, SLC25A6, CLCN4, STS, TLR8, ARSF, FRMPD4, GLRA2, TRAPPC2
RD_P586	der(X)	16.2	A	Chr X	58080098	74310915	Xp11.1	Xq13.3	77	14; ZDHHC15, HDAC8, XIST, DLG3, ARHGEF9, OPHN1, SLC16A2, MED12, ZMYM3, AR, NEXMIF, EDA, ZC4H2, NONO	27; ZDHHC15, EFNB1, HDAC8, RLIM, KIF4A, XIST, DLG3, ARHGEF9, GJB1, AMER1, OPHN1, SLC16A2, MED12, ABCB7, ZMYM3, IGBP1, LAS1L, PHKA1, AR, NEXMIF, EDA, ZC4H2, TAF1, OGT, NONO, STARD8, MAGEE2
		0.0	B*	Chr X	66181028	66184481	Xq12	Xq12	0	0	0
		8.1	C	Chr X	75059486	83190233	Xq13.3	Xq21.1	26	6; TBX22, MAGT1, ATP7A, BRWD3, PGK1, ATRX	7; TBX22, MAGT1, ATP7A, BRWD3, PGK1, ATRX, COX7B
		0.0	D	Chr X	83792179	83829717	Xq21.1	Xq21.2	1	0	0
		4.9	E	Chr X	84675390	89566572	Xq21.2	Xq21.31	7	0	2; KLHL4, CPXCR1
		14.3	F	Chr X	89651697	103977823	Xq21.31	Xq22.3	68	7; NXF5, PLP1, TIMM8A, GLA, SRPX2, PCDH19, BTK	14; NXF5, PABPC5, HNRNPH2, PLP1, TIMM8A, SLC25A53, SRPX2, XKRX, TCEAL1, TAF7L, CSTF2, PCDH19, DIAPH2, BTK
		0.1	G*	Chr X	91038187	91089607	Xq21.31	Xq21.31	2	0	0
		3.6	H	Chr X	141163862	144762602	Xq27.2	Xq27.3	10	0	0
		9.5	I	Chr X	144762724	154259565	Xq27.3	Xq28	133	20; SLC6A8, IKBKG, L1CAM, ABCD1, MTM1, RPL10, CCNQ, AVPR2, NSDHL, AFF2, GDI1, NAA10, IDS, MECP2, BCAP31, F8, RAB39B, FMR1, FLNA, DKC1	31; SLC6A8, BGN, IKBKG, L1CAM, FAM50A, ATP6AP1, ABCD1, IRAK1, MTM1, RPL10, ATP2B3, AVPR2, NSDHL, AFF2, GDI1, NAA10, TKTL1, IDS, SPRY3, CLIC2, MECP2, BCAP31, RAB39B, HMGB3, FMR1, HCFC1, RENBP, FLNA, MAGEA11, SSR4, DKC1
		9.1	J*	Chr X	145148123	154259565	Xq27.3	Xq28	132	20; same as Seg I	31; Same as seg I
* Triplicated segments

## Sheet: Supplemental Table S3
Supplemental Table 3: Nomenclature of the resolved sSMCs according to ISCN 2024.
Case ID	Cyogenomic description
RD_P276	seq[T2T-CHM13v2.0] +r(5)(p13.3→p13.2::p12→q11.1)
	NC_060929.1:g.32320809_37676103::43290183_49497791sup
RD_P278	seq[T2T-CHM13v2.0] +r(7)(p11.2→p11.2::q11.22→p11.2)
	NC_060931.1:g.59978281_59987274::59987351_72094570invsup
RD_P273	seq[T2T-CHM13v2.0] +r(8)(q11.1→q11.21::q21.13→q11.22)
	NC_060932.1:g.46120188_50587595::51426339_77860383invsup
RD_P272	seq[T2T-CHM13v2.0] +r(9)(p21.1→p21.1::q21.31→q21.31::p12→p21.1::p11.2→?::?→p21.1)
	NC_060933.1:g.28144043_29574388::91060755_91194419inv::32076512_39306747inv:: 44432381_?::30592557_?inv::31050290_31568556sup
RD_P166	seq[T2T-CHM13v2.0] +r(13)(?→p11.2::q21.1→q31.1::q12.3→?)
	NC_060937.1:g.?_11452840::56358138_84773620::29045867_?sup
RD_P550	seq[T2T-CHM13v2.0] +r(14)(p11.2q11.2)
	NC_060938.1:g.9208604::16434843sup
RD_P275	seq[T2T-CHM13v2.0] +r(20)(p13→p13::q13.31→q13.33::p11.21→q12)
	NC_060944.1:g.3306020_ 4979434::59369410_65776662::24892355_42368945sup
RD_P328	seq[T2T-CHM13v2.0] +der(7)(Xpter→Xp22.2::7q11.23→7p13::5q35.3→5qter)
	NC_060947.1:g.pter_14614119::NC_060931.1:g.43886314_75313264inv::NC_060929.1:g.177119928_qtersup
RD_P586	seq[T2T-CHM13v2.0] +der(X)(qter→q27.3::q22.3→q21.31::q21.31→q21.2::q12→q12::p11.1→q13.3::q27.3→q27.2::q21.1→q21.2::q13.3→q21.1::q21.31→q21.31::q27.3→qter)
	NC_060947.1:g.145148123_qterinv::89651697_103977823inv::84675390_89566572inv::66181028_66184481::58080098_74310915::141163862_141163862inv::83792179_83829717::75059486_83190233::91038187_91089607::144762724_qtersup
